# Supplementary material
Source: PubMed Central journal article supplement (PMC2810274)
Supplement: Supp_Fig.pdf [file Supp_Fig.pdf]

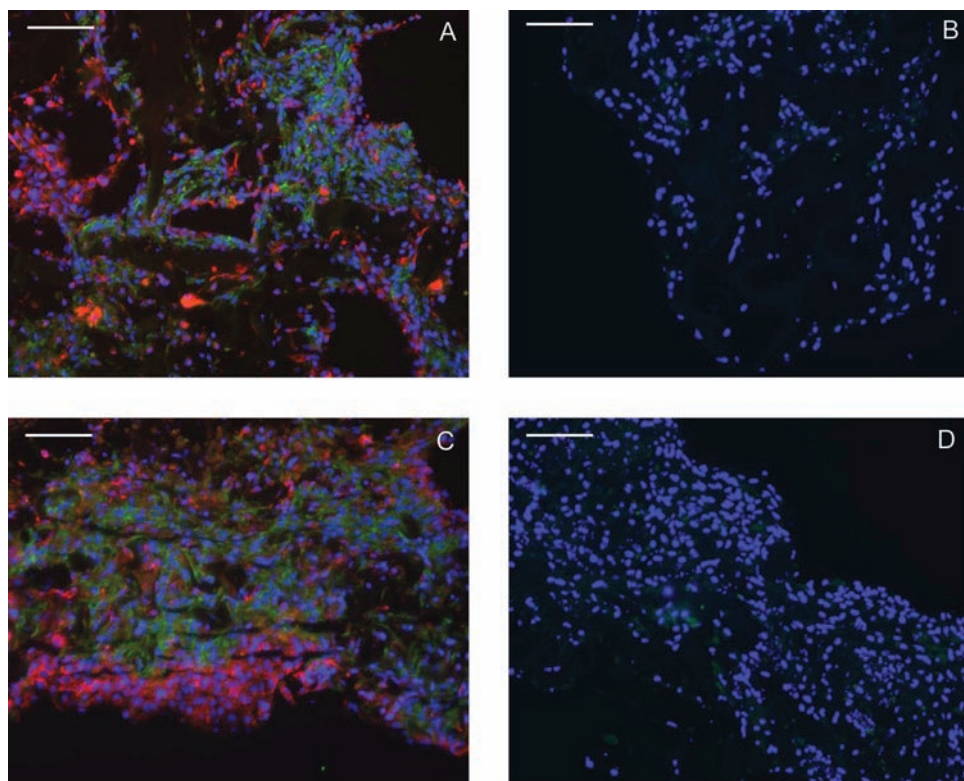

**SUPPLEMENTAL FIG. S1.** Immunofluorescent staining for cell-specific markers. (A, B) Nonstimulated controls. (C, D) Stimulated samples. (A, C) Double staining for cardiac troponin I (green) identifying cardiomyocytes and vimentin (red) identifying nonmyocytes. (B, D) Immunostaining for von Willebrand factor. Endothelial cells should appear green. The nuclei were counterstained blue with DAPI. Scale bar: 100  $\mu$ m.
